# Supplementary material for: A Sequential Anammox Zeolite-Biofilter for the Removal of Nitrogen Compounds from Drinking Water
Source: MDPI journal article supplement (doi:10.3390/w14213512), 2022-11-02
Supplement: s1 [file s1]

---

*Article*

# **A Sequential Anammox Zeolite-Biofilter for the Removal of Nitrogen Compounds from Drinking Water**

**Stephan Eberle <sup>1</sup>, Hilmar Börnick <sup>1</sup> and Stefan Stolte <sup>1\*</sup>**

<sup>1</sup> Institute for Water Chemistry, Technische Universität Dresden, 01062 Dresden, Germany

\* stefan.stolte@tu-dresden.de, Tel. +49(0)351/463-32759

## Supporting Information

### S1 Inoculation of the Anammox zeolite-biofilter

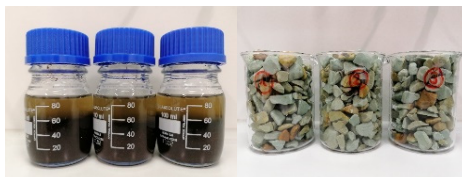

Left:

90 mL sludge mixture per filter segment. Sludge from wastewater treatment plants from Rotterdam and Wansdorf.

Right:

473±1 g of zeolites per segment.

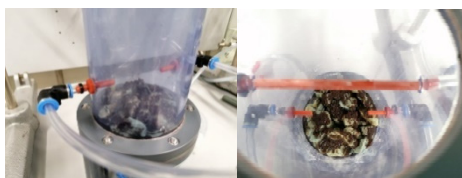

First Anammox zeolite layer. Side (left) and topdown (right) views.

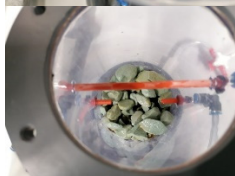

Following 10 mL of sludge inoculum, a second layer of zeolites was added.

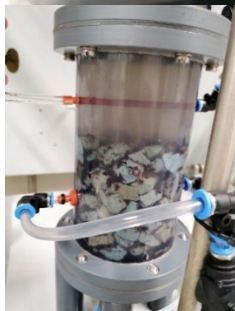

First segment completed and filled with oxygen free nutrient solution.

Segment 2 and 3 were completed using the same inoculation procedure.

**Figure S1.** Inoculation steps of the Anammox zeolite-biofilter.

### S2 Completed Anammox zeolite-biofilter

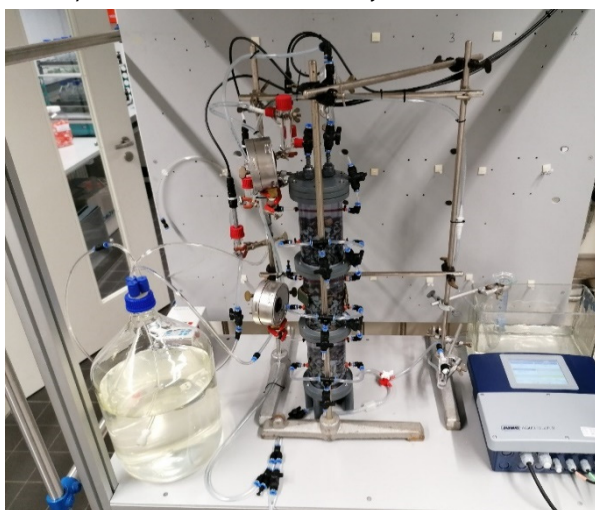

(a)

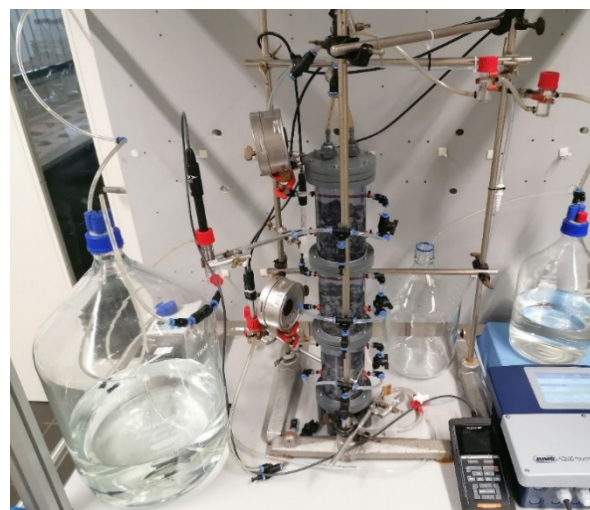

(b)

**Figure S2.** Completed Anammox zeolite-biofilter in circular flow (a); and (b) flow through operation mode.

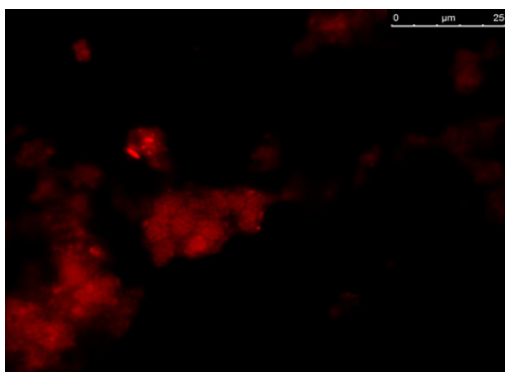

**Figure S3-1.** Qualitative detection of Amx in the inoculated sludge.

**Table S1.** Typical chemical composition of the Elbe-/tap water mixture used (1:10).

| Na <sup>+</sup><br>(mg/L) | K <sup>+</sup><br>(mg/L) | Ca <sup>2+</sup><br>(mg/L) | Mg <sup>2+</sup><br>(mg/L) | NH <sub>4</sub> <sup>+</sup><br>(mg/L) | NO <sub>2</sub> <sup>-</sup><br>(mg/L) | NO <sub>3</sub> <sup>-</sup><br>(mg/L) | TN<br>(mg/L) | DOC<br>(mg/L) | HCO <sub>3</sub> <sup>-</sup><br>(mg/L) |
|---------------------------|--------------------------|----------------------------|----------------------------|----------------------------------------|----------------------------------------|----------------------------------------|--------------|---------------|-----------------------------------------|
| 10.57                     | 1.95                     | 17.63                      | 8.75                       | 4.16                                   | 5.56                                   | 2.41                                   | 5.46         | 2.53          | 77.40                                   |

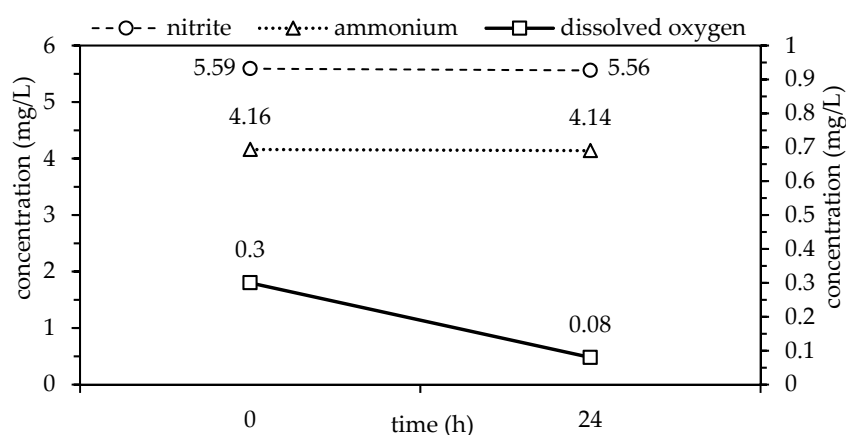

**Figure S3-2.** Substrate and dissolved oxygen concentrations in the receiving tank over a 24 h period.

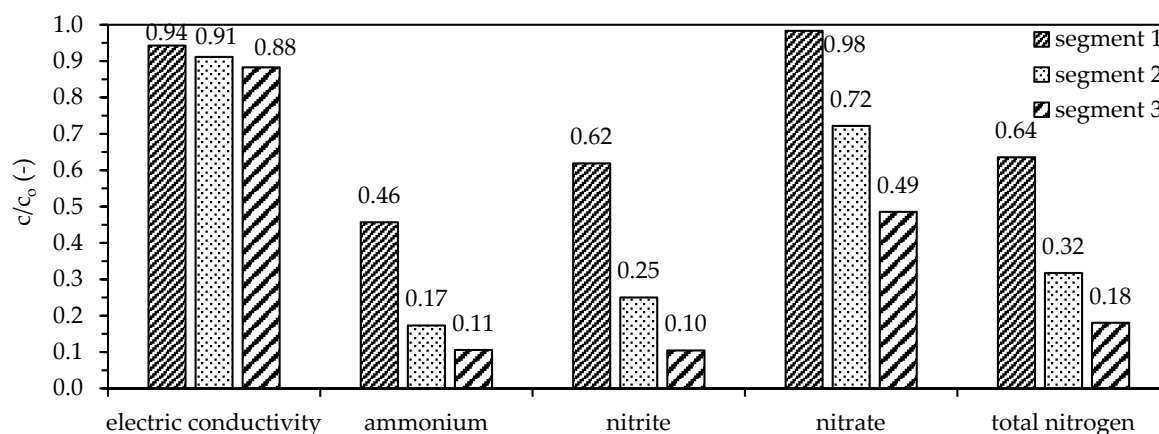

**Figure S3-3.** Nitrogen degradation efficiencies and decreasing electrical conductivity in each segment of the Anammox zeolite-biofilter for the first investigation after sludge inoculation at the starting point (matrix: Elbe/

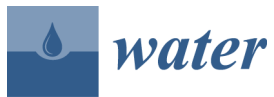

---

tap water (1:10);  $v_F = 0.032$  m/h;  $c_0(\text{NH}_4^+) = 4.3$  mg/L;  $c_0(\text{NO}_2^-) = 5.7$  mg/L;  $c_0(\text{DOC}) = 2.5$  mg/L; pH: 7.8;  $T = 22$  °C;  $n = 1$ ).

S4 Investigations of the Nitrite/Ammonium-Ratio and Half-Life

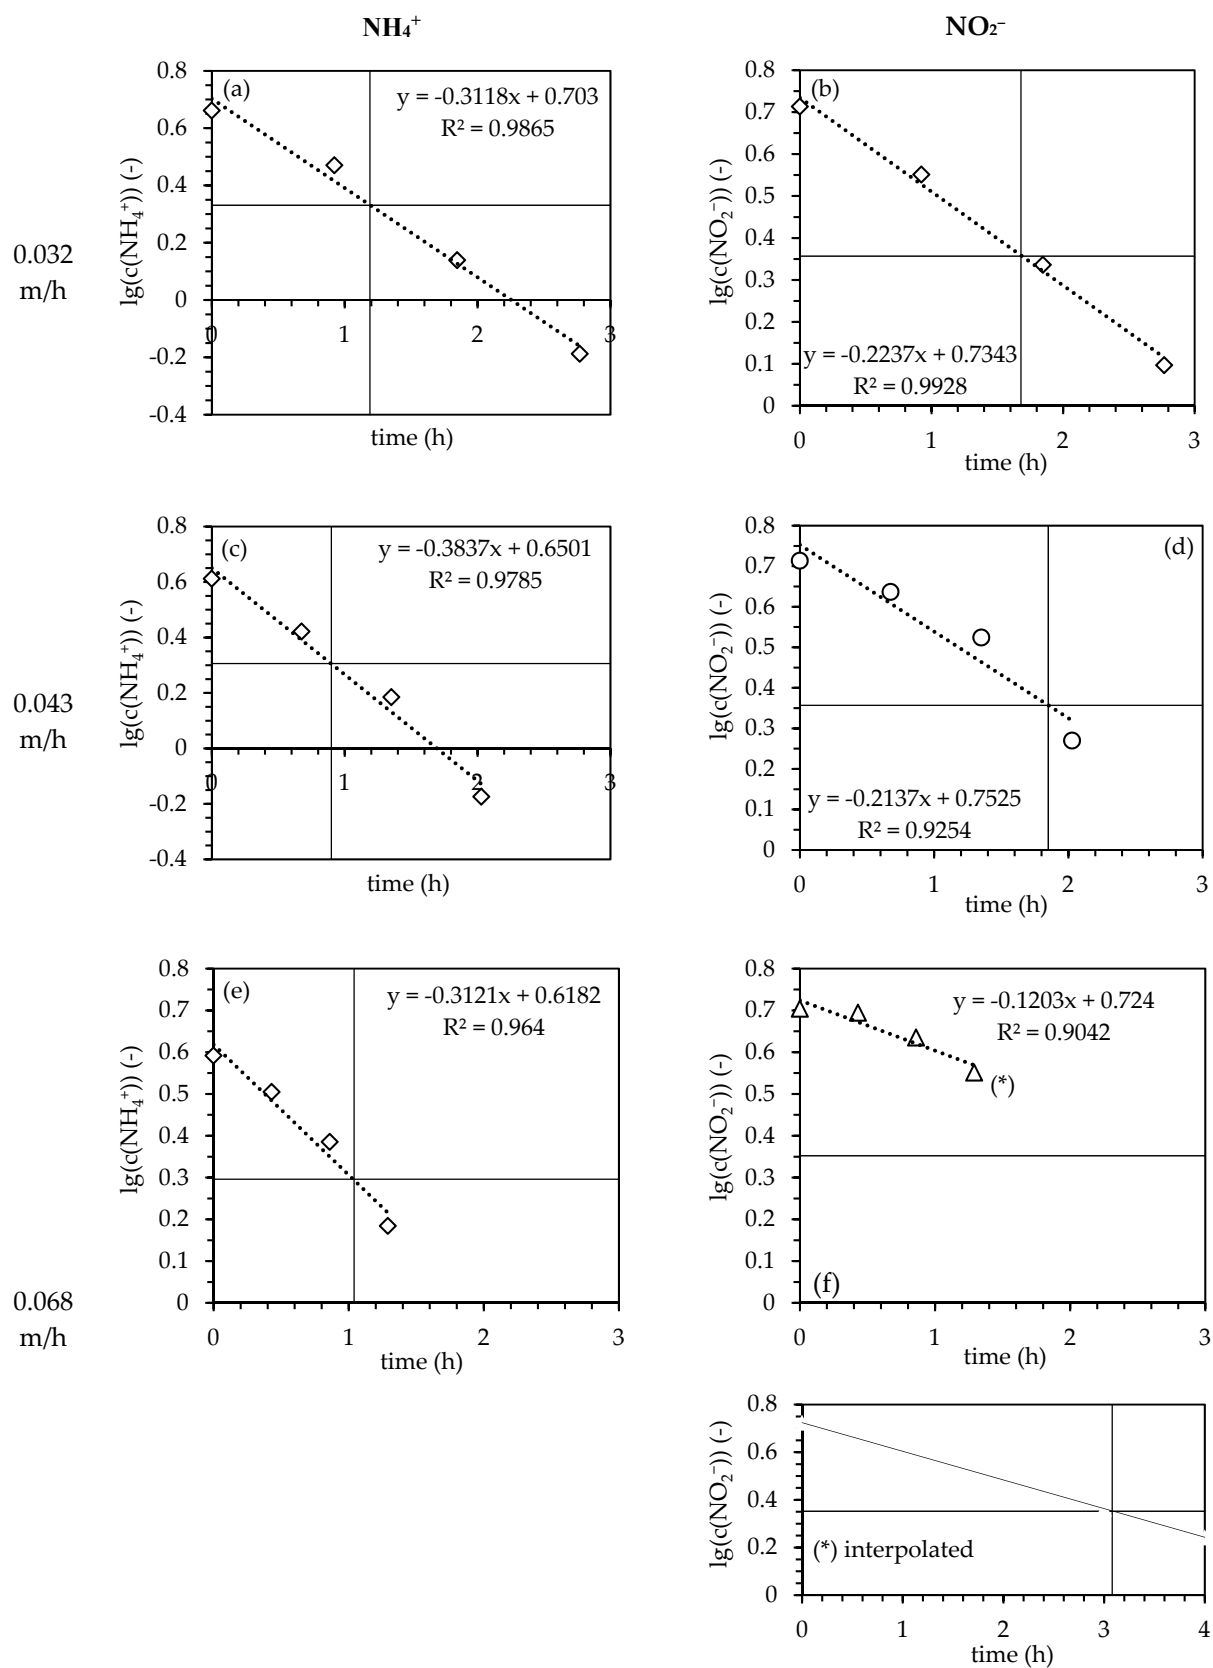

**Figure S4.** Determination of the half-life period of  $\text{NH}_4^+$  and  $\text{NO}_2^-$  degradation and its dependence on filter velocity: (a), (b) for 0.032 m/h; (c), (d) for 0.043 m/h; and (e), (f) for 0.068 m/h.

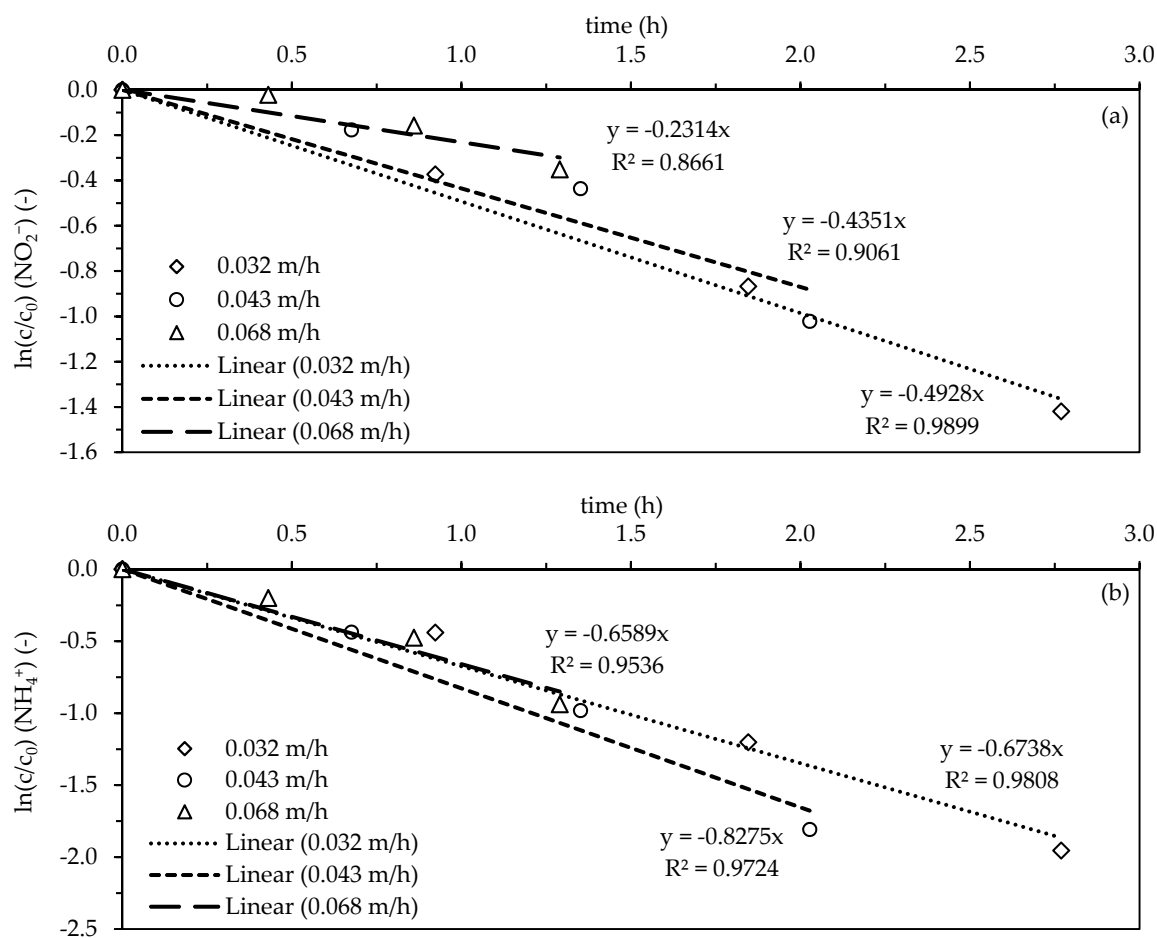

**Figure S5.** Determination of the reaction rate constant  $k$  for the pseudo first order.  $k$  determined by plotting the logarithm of the substrate concentration against the effective hydraulic retention time: (a) for  $\text{NO}_2^-$ ; and (b) for  $\text{NH}_4^+$ .

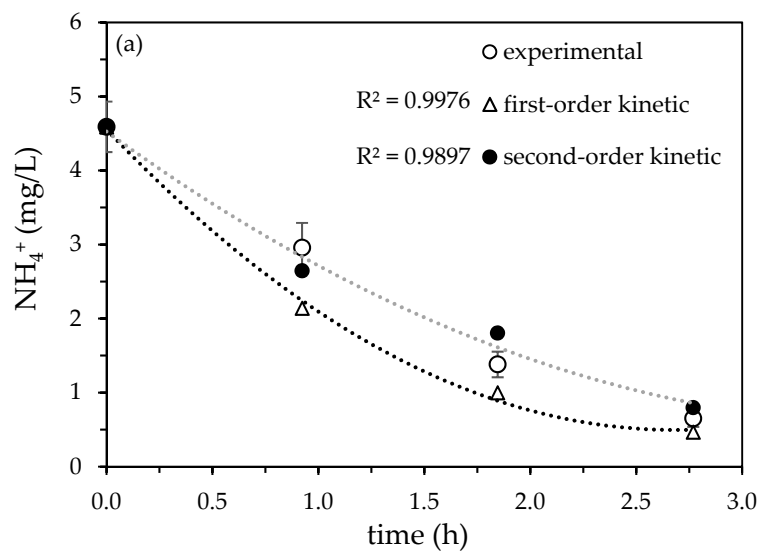

0.032 m/h

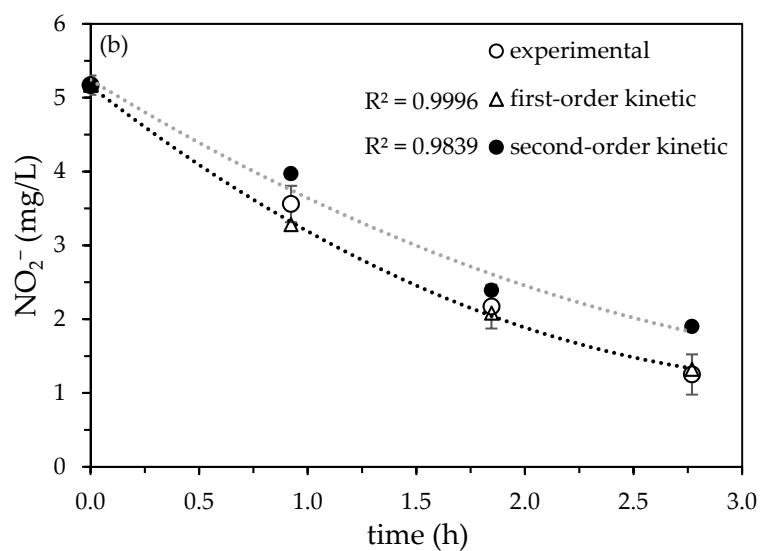

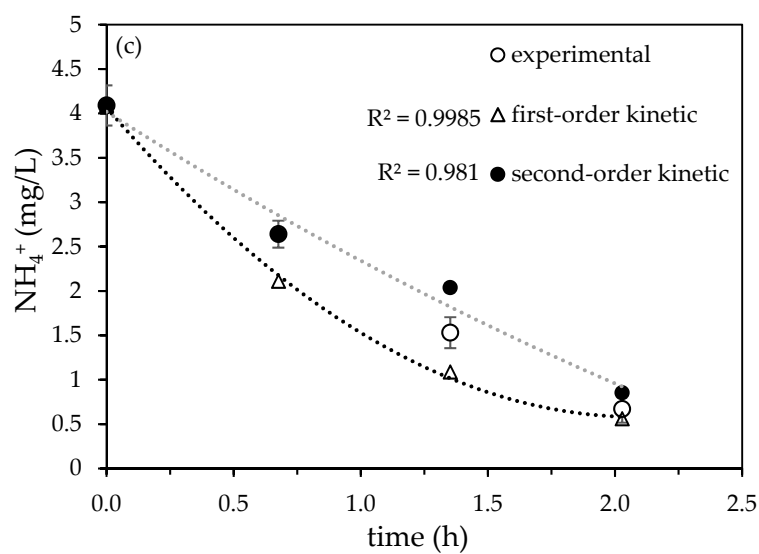

0.043 m/h

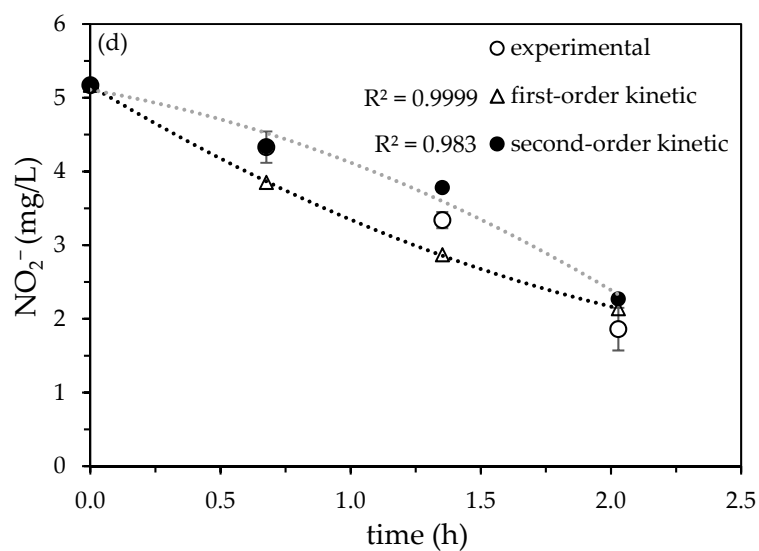

0.068 m/h

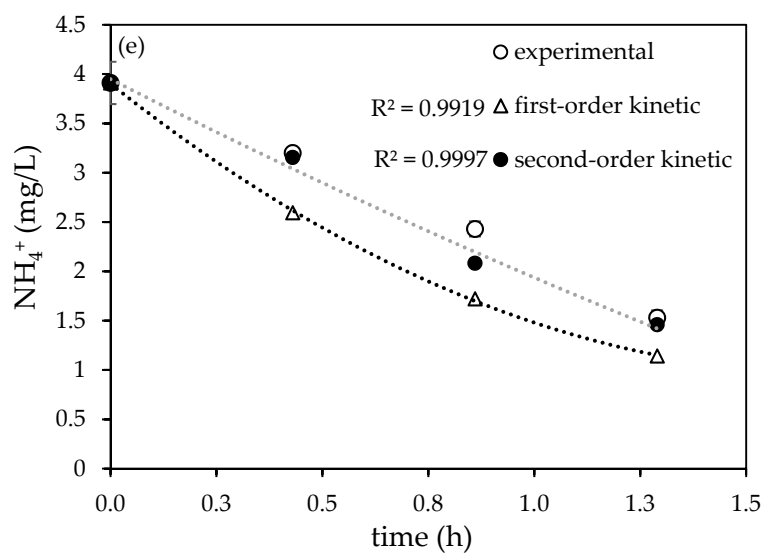



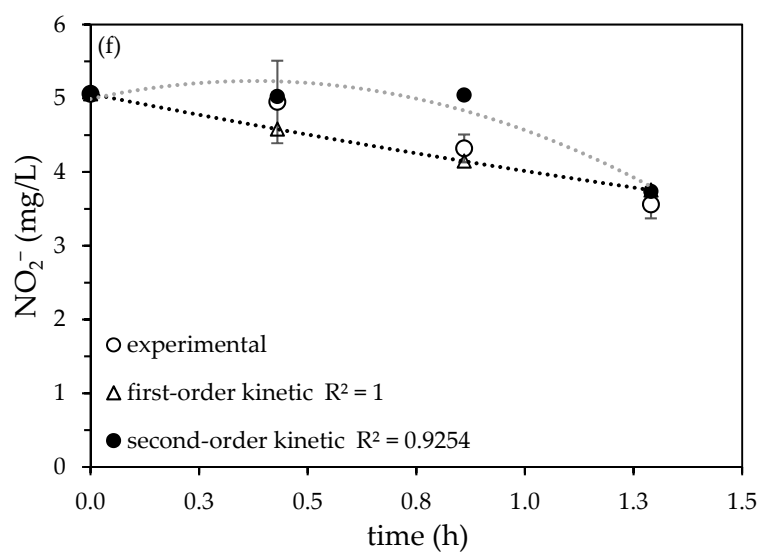

**Figure S6.** Calculated filter-velocity dependent reaction first-order and second-order for  $\text{NH}_4^+$  and  $\text{NO}_2^-$  removal compared to experimental data: (a), (b) for 0.043 m/h; (c), (d) for 0.043 m/h; and (e), (f) for 0.068 m/h (matrix: Elbe-/tap water (1:10);  $v_F = 0.032, 0.043, 0.068$  m/h;  $c_0(\text{NH}_4^+) = 4.3$  mg/L;  $c_0(\text{NO}_2^-) = 5.7$  mg/L;  $c_0(\text{DOC}) = 2.5$  mg/L; pH: 7.8;  $T = 22^\circ\text{C}$ ;  $n = 3$ ).

#### S7 Degradation of Nitrogen Compounds

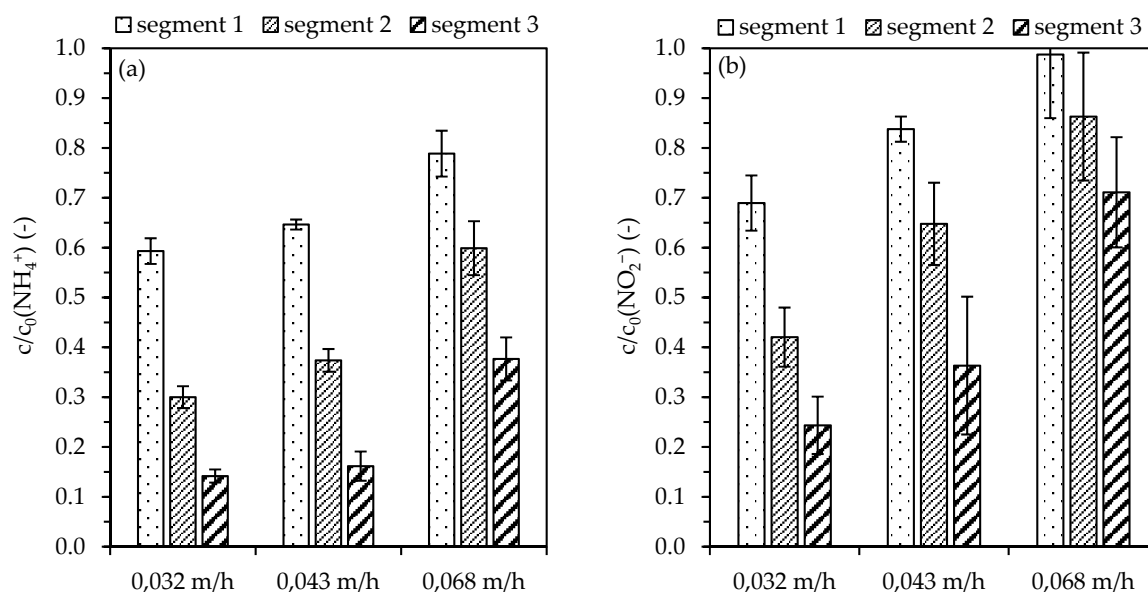

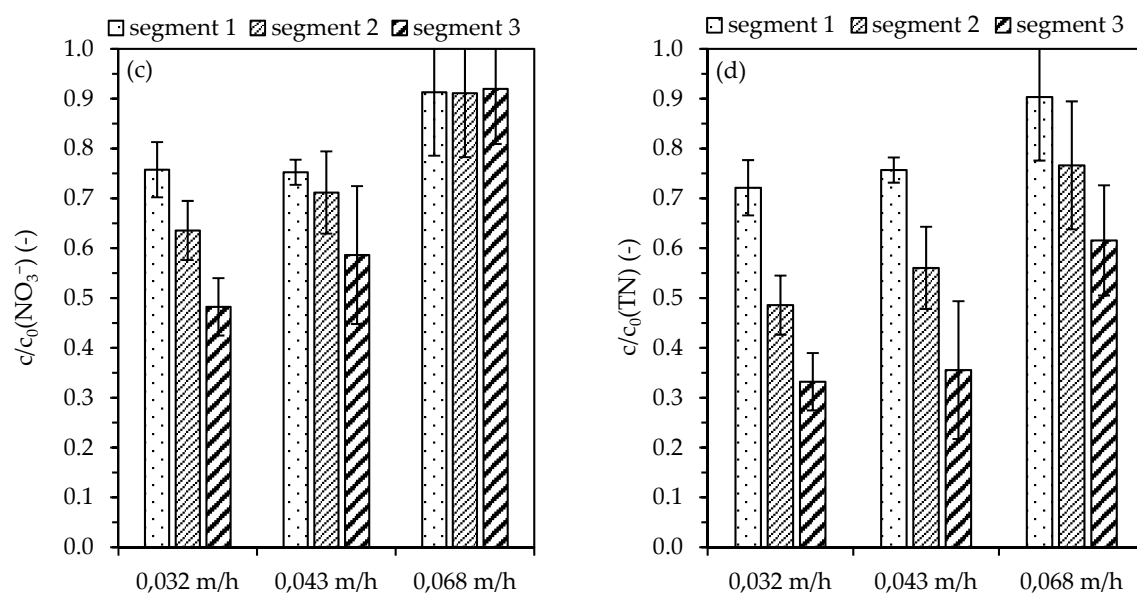

**Figure S7.** Degradation of nitrogen compounds depending on the filter velocity and Anammox zeolite-biofilter's height: (a) for  $\text{NH}_4^+$ ; (b) for  $\text{NO}_2^-$ ; (c) for  $\text{NO}_3^-$ ; and (d) for TN.
